# Supplementary material
Source: HighWire-hosted journal article supplement (doi:10.1101/rna.081083.126)
Supplement: Supplemental_TableS1.xlsx [file Supplemental_TableS1.xlsx]

## Sheet: RNAs and DNA primers
Supplemental Table S1 List of RNAs and primers used in this study. Gm indicates 2'-O-methylguanosine.
RNA name	RNA sequence	Extension primer (forward)	Extension primer (reverse)	PCR primer (forward)	PCR primer (reverse)
dFx	GGAUCGAAAGAUUUCCGCAUCCCCGAAAGGGUACAUGGCGUUAGGU	GTAATACGACTCACTATAGGATCGAAAGATTTCCGC	ACCTAACGCCATGTACCCTTTCGGGGATGCGGAAATCTTTCGATCC	GGCGTAATACGACTCACTATAG	ACCTAACGCCATGTACCCT
eFx	GGAUCGAAAGAUUUCCGCGGCCCCGAAAGGGGAUUAGCGUUAGGU	GTAATACGACTCACTATAGGATCGAAAGATTTCCGC	ACCTAACGCTAATCCCCTTTCGGGGCCGCGGAAATCTTTCGATCC	GGCGTAATACGACTCACTATAG	ACCTAACGCTAATCCCCT
tRNA, Pro1(CGG)	CGGUGAUUGGCGCAGCCUGGUAGCGCACUUCGUUCGGGACGAAGGGGUCGGAGGUUCGAAUCCUCUAUCACCGACCA	GTAATACGACTCACTATACGGTGATTGGCGCAGCCTGGTAGCGCACTTCGTTCGGGACG	TGGTCGGTGATAGAGGATTCGAACCTCCGACCCCTTCGTCCCGAACGAAGTGC	GGCGTAATACGACTCACTATAC	TGmGTCGGTGATAGAGGATTC
tRNA, Pro1C13G(CGG)	CGGUGAUUGGCGGAGCCUGGUAGCGCACUUCGUUCGGGACGAAGGGGUCGGAGGUUCGAAUCCUCUAUCACCGACCA	GTAATACGACTCACTATACGGTGATTGGCGGAGCCTGGTAGCGCACTTCGTTCGGGACG	TGGTCGGTGATAGAGGATTCGAACCTCCGACCCCTTCGTCCCGAACGAAGTGC	GGCGTAATACGACTCACTATAC	TGmGTCGGTGATAGAGGATTC
tRNA, Pro1E2(GAG)	GGGUGAUUGGCGCAGCCUGGUAGCGCACUUCGUUGAGGUCGAAGGGGUCAGGGGUUCGAAUCCCCUAUCACCCGCCA	GTAATACGACTCACTATAGGGTGATTGGCGCAGCCTGGTAGCGCACTTCG	TGGCGGGTGATAGAGGATTCGAACCTCCGACCCCTTCGACCTCAACGAAGTGCGCTACCAGG	GGCGTAATACGACTCACTATAG	TGmGCGGGTGATAGGGGATTC
tRNA, Pro1E2(GGU)	GGGUGAUUGGCGCAGCCUGGUAGCGCACUUCGUUGGUAACGAAGGGGUCAGGGGUUCGAAUCCCCUAUCACCCGCCA	GTAATACGACTCACTATAGGGTGATTGGCGCAGCCTGGTAGCGCACTTCG	TGGCGGGTGATAGAGGATTCGAACCTCCGACCCCTTCGTTACCAACGAAGTGCGCTACCAGG	GGCGTAATACGACTCACTATAG	TGmGCGGGTGATAGGGGATTC
tRNA, Pro1E2(GGA)	GGGUGAUUGGCGCAGCCUGGUAGCGCACUUCGCUGGAAACGAAGGGGUCAGGGGUUCGAAUCCCCUAUCACCCGCCA	GTAATACGACTCACTATAGGGTGATTGGCGCAGCCTGGTAGCGCACTTCG	TGGCGGGTGATAGAGGATTCGAACCTCCGACCCCTTCGTTTCCAGCGAAGTGCGCTACCAGG	GGCGTAATACGACTCACTATAG	TGmGCGGGTGATAGGGGATTC
tRNA, Pro1E2(GAA)	GGGUGAUUGGCGCAGCCUGGUAGCGCACUUCGCUGAAAACGAAGGGGUCAGGGGUUCGAAUCCCCUAUCACCCGCCA	GTAATACGACTCACTATAGGGTGATTGGCGCAGCCTGGTAGCGCACTTCG	TGGCGGGTGATAGAGGATTCGAACCTCCGACCCCTTCGTTTTCAGCGAAGTGCGCTACCAGG	GGCGTAATACGACTCACTATAG	TGmGCGGGTGATAGGGGATTC
tRNA, AsnE2(GAG)	GGCUCUGUAGUUCAGUCGGUAGAACGGCGGAUUGAGGUUCCGUAUGUCACUGGUUCGAGUCCAGUCAGAGCCGCCA	GTAATACGACTCACTATAGGCTCTGTAGTTCAGTCGGTAGAACGGCGGA	TGGCGGCTCTGACTGGACTCGAACCAGTGACATACGGAACCTCAATCCGCCGTTCTACCGACTG	GTAATACGACTCACTATAG	TGmGCGGCTCTGACTGGAC
tRNA, AsnE2(GGU)	GGCUCUGUAGUUCAGUCGGUAGAACGGCGGAUUGGUAAUCCGUAUGUCACUGGUUCGAGUCCAGUCAGAGCCGCCA	GTAATACGACTCACTATAGGCTCTGTAGTTCAGTCGGTAGAACGGCGGA	TGGCGGCTCTGACTGGACTCGAACCAGTGACATACGGATTACCAATCCGCCGTTCTACCGACTG	GTAATACGACTCACTATAG	TGmGCGGCTCTGACTGGAC
